# Supplementary material for: Fresh Chokeberry (Aronia melanocarpa) Fruits as Valuable Additive in Extruded Snack Pellets: Selected Nutritional and Physiochemical Properties
Source: MDPI journal article supplement (doi:10.3390/plants12183276), 2023-09-15
Supplement: s1 [file s1]

**Table S1.** Parameters of the calibration curve for nine different phenolic acids.

| No. | Compound            | Calibration Curve                      | R <sup>2</sup> |
|-----|---------------------|----------------------------------------|----------------|
| 1   | protocatechuic acid | $y = -0.0254 x^2 + 1.4661 x + 0.0137$  | 0.997          |
| 2   | p-OH-benzoic acid   | $y = -0.0117 x^2 + 1.4390 x + 0.1649$  | 0.997          |
| 3   | vanillic acid       | $y = 0.0001 x^2 + 0.1940 x - 0.0031$   | 0.998          |
| 4   | caffeic acid        | $y = -0.0183 x^2 + 2.4210 x + 0.4368$  | 0.995          |
| 5   | syringic acid       | $y = -0.00005 x^2 + 0.2598 x - 0.0026$ | 0.986          |
| 6   | p-coumaric acid     | $y = -0.0166 x^2 + 2.0582 x + 2.0582$  | 0.993          |
| 7   | ferulic acid        | $y = -0.0004 x^2 + 0.3801 x + 3.3001$  | 0.994          |
| 8   | synapic acid        | $y = -0.0032 x^2 + 0.5524 x - 0.0620$  | 0.998          |
| 9   | salicylic acid      | $y = -0.0338 x^2 + 3.2638 x + 0.8268$  | 0.998          |

**Table S2.** Parameters of the calibration curve for nine different anthocyanins.

| No. | Compound               | Calibration Curve                            | R <sup>2</sup> | Standard      |
|-----|------------------------|----------------------------------------------|----------------|---------------|
| 1   | cyanidin-3-galactoside | $y = 0.0356116 x^2 + 1.46712 x + 0.028605$   | 0.998          | Sigma Aldrich |
| 2   | cyanidin-3-glucoside   | $y = -0.0234753 x^2 + 1.67904 x + 0.133956$  | 0.998          | Sigma Aldrich |
| 3   | cyanidin-3-arabinoside | $y = 0.02451638 x^2 + 0.6744029 x - 0.05311$ | 0.998          | Sigma Aldrich |
| 4   | cyanidin-3-xyloside    | $y = 0.04351638 x^2 + 0.6327 x - 0.43343$    | 0.998          | Sigma Aldrich |

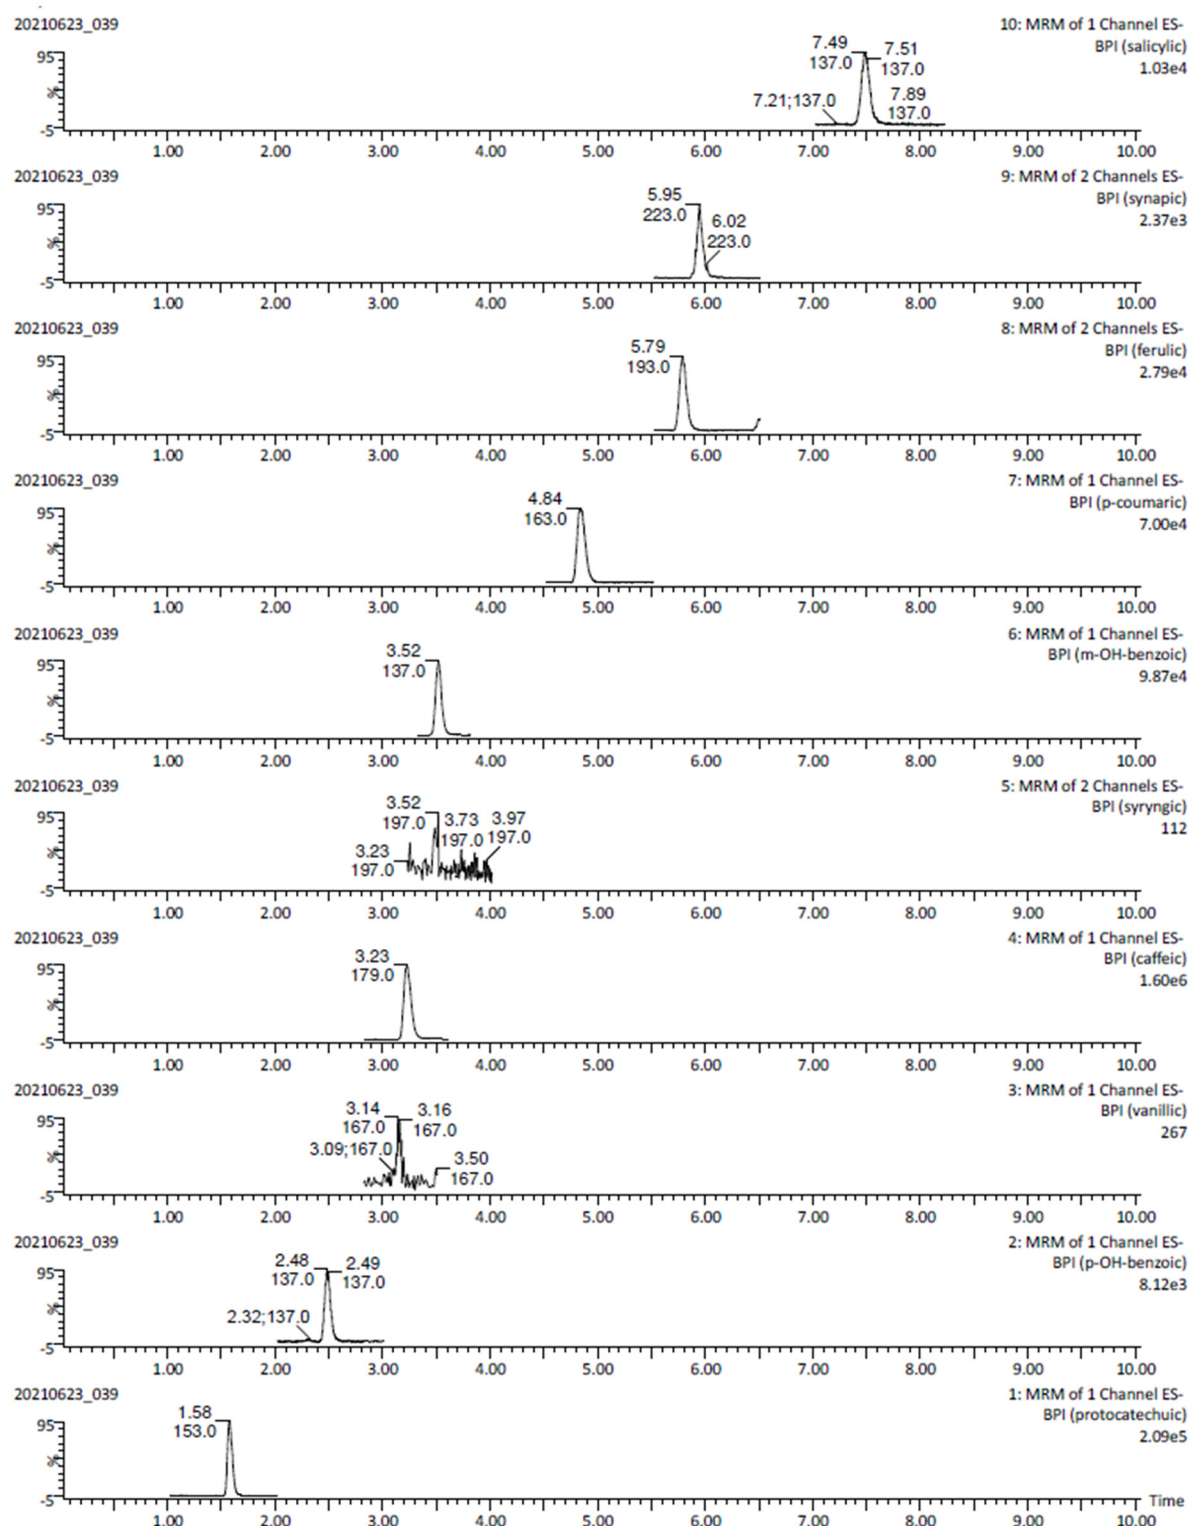

**Figure S1.** Chromatogram of the tested phenolic acids in snack pellets processed at 36 mc and 60 rpm supplemented with 30% of chokeberry.
